# Supplementary material for: Comparison of optical properties of chromophoric dissolved organic matter (CDOM) in alpine lakes above or below the tree line: insights into sources of CDOM
Source: Royal Society of Chemistry journal article supplement (doi:10.1039/c4pp00478g), 2015-02-04
Supplement: c4pp00478g1.pdf [file c4pp00478g1.pdf]

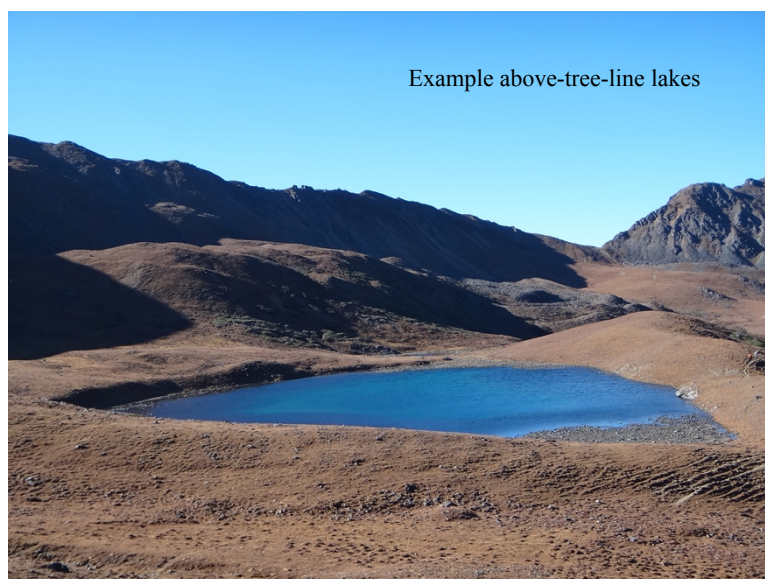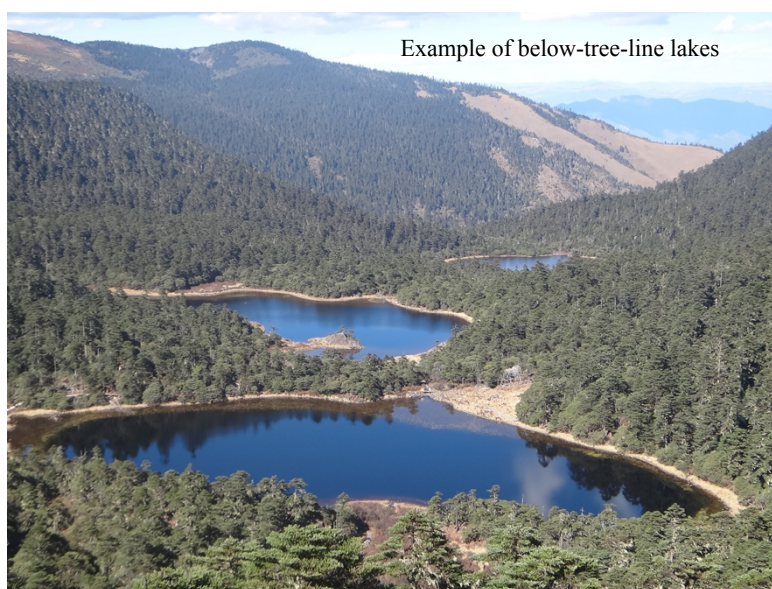

**Fig. S1** Photos of examples of above- and below-tree-line lakes

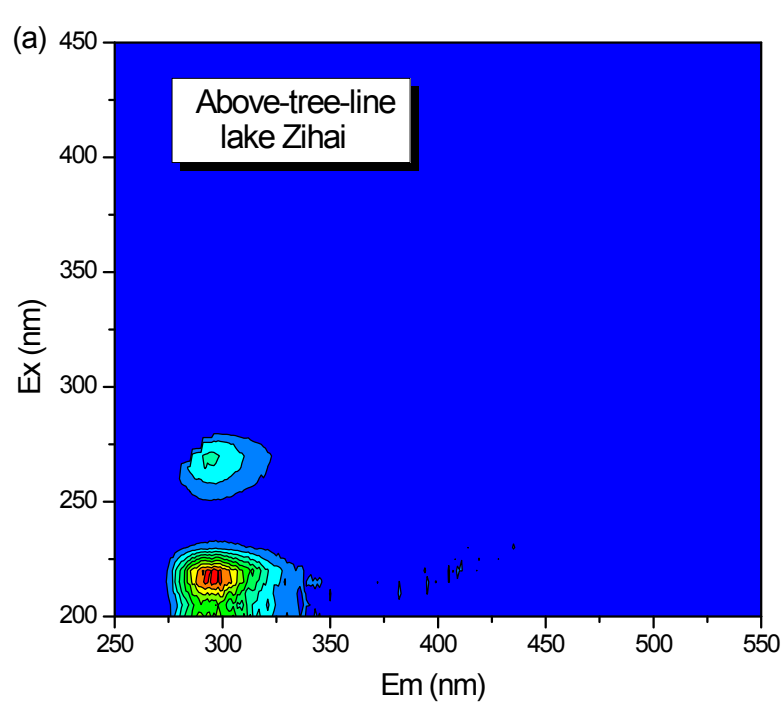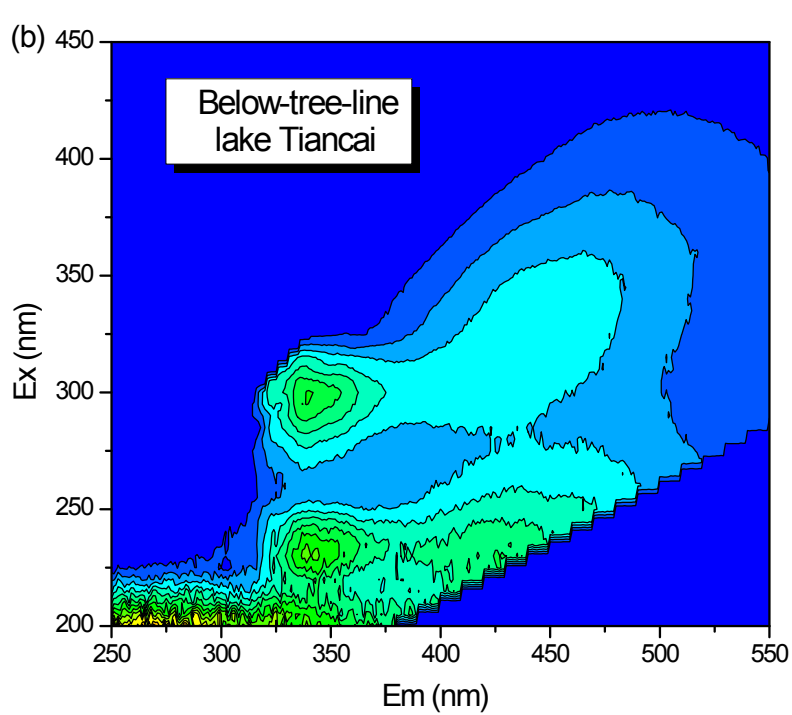

**Fig. S2.** Examples of EEMs for sample from (a) above-tree-line lake Zihai and (b) below-tree-line lake Tiancai.

Table S1. Spectral characteristics  $Ex_{max}$  and  $Em_{max}$  of 4 components compared with fluorescence peaks identified in previous work.

| Component No. | $Ex_{max}$ (nm) * | $Em_{max}$ (nm)      | Peaks in other previous work *                                                                                  | Property and probable source                                |
|---------------|-------------------|----------------------|-----------------------------------------------------------------------------------------------------------------|-------------------------------------------------------------|
| S1            | 230-245           | 285-295<br>(310-375) | $Ex_{max}$ : < 240<br>$Em_{max}$ : 330-370 <sup>a-d</sup><br>(300) <sup>e</sup>                                 | (T, A, M) <sup>**</sup><br>Tryptophan-like fluorescence     |
| S2            | 210-220           | 265-270<br>(285-295) | $Ex_{max}$ : < 240<br>$Em_{max}$ : 300-312 <sup>a,c, e</sup>                                                    | (T, A, M)<br>Tyrosine-like fluorescence                     |
| S3            | 230 (300)         | 338                  | $Ex_{max}$ : 240 (300)<br>$Em_{max}$ : 338 <sup>f</sup><br>$Ex_{max}$ : 280, $Em_{max}$ :<br>325 <sup>g</sup> ; | (T, A, M)<br>Tryptophan-like<br>or phenolic<br>fluorescence |
| S4            | 300-340           | 400-450              | $Ex_{max}$ : 320-360<br>$Em_{max}$ : 420-480 <sup>a,b,h,i</sup>                                                 | (T)<br>UV humic-like<br>fluorescence                        |

\* Secondary excitation band is listed in brackets.

\*\* T: Terrestrial source; A: Autochthonous source; M: Microbial source.

<sup>a</sup> Stedmon et al. (2003).

<sup>b</sup> Stedmon and Markager (2005a).

<sup>c</sup> Stedmon and Markager (2005b).

<sup>d</sup> Cory and McKnight (2005).

<sup>e</sup> Zhu et al. (2012).

<sup>f</sup> Murphy et al. (2006).

<sup>g</sup> Maie et al. (2007).

<sup>h</sup> Coble (1996).

<sup>i</sup> Coble et al. (1998).
